# Supplementary material
Source: ML conference proceedings conference paper supplement (https://openreview.net/forum?id=xJ7XL5Wt8iN)
Supplement: supplementary_material [file attachment]

# Appendix of CLUE

Anonymous Author(s)

Affiliation

Address

email

## A Additional Results

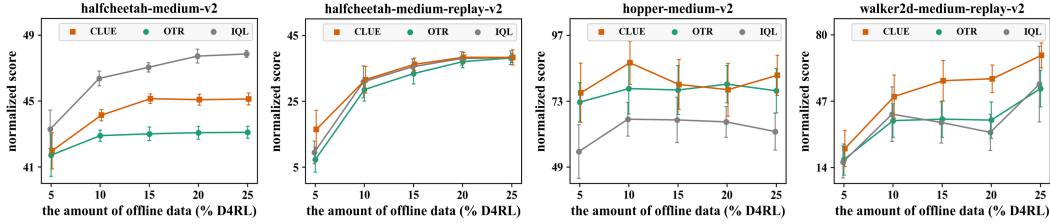

Figure 1: Ablating the number of unlabeled trajectories. We investigate the effect of unlabeled trajectories on the performance. CLUE’s performance generally outperforms OTR. Further, we can see that CLUE approximates the vanilla IQL method (with D4RL rewards) more closely and can even outperform IQL given such a lack of offline data ( $\leq 25\%$ ).

**Varying the amount of unlabeled offline data.** Here we vary the amount of unlabeled offline data available for sparse-reward settings. Figure 1 shows that adding more unlabeled data improves the performance of both CLUE and OTR. However, across a range of offline imitation tasks, CLUE shows better performance compared to OTR. We also plot the performance curve of naive IQL with (reward-labeled) offline data in Figure 1. We can see that with extremely limited offline data ( $\leq 25\%$ ), CLUE approaches IQL’s performance more closely on the halfcheetah-medium task, and can even outperform IQL on the remaining three tasks.

Table 1: Using 10% of D4RL data, normalized scores (mean and standard deviation) of CLUE and baselines on antmaze tasks using one ( $K=1$ ) and ten ( $K=10$ ) expert demonstrations. The expert trajectories are picked from the chosen 10% dataset. The highest score in each setting is highlighted.

| Dataset          | IQL            | OTR ( $K=1$ )   | CLUE ( $K=1$ )  | OTR ( $K=10$ )    | CLUE ( $K=10$ )  |
|------------------|----------------|-----------------|-----------------|-------------------|------------------|
| umaze            | $73.7 \pm 7.6$ | $71.4 \pm 8.5$  | $75.4 \pm 6.1$  | $75.1 \pm 8.3$    | $82.5 \pm 5.1$   |
| umaze-diverse    | $21.6 \pm 9.8$ | $33.0 \pm 8.5$  | $45.4 \pm 10.4$ | $30.8 \pm 13.5^*$ | $58.6 \pm 9.5^*$ |
| medium-play      | $23.0 \pm 8.9$ | $38.7 \pm 11.1$ | $30.5 \pm 13.9$ | $37.3 \pm 10.0$   | $36.6 \pm 12.7$  |
| medium-diverse   | $54.9 \pm 7.8$ | $60.9 \pm 8.7$  | $64.4 \pm 8.9$  | $59.2 \pm 9.2$    | $57.8 \pm 8.6$   |
| large-play       | $5.8 \pm 3.8$  | $15.0 \pm 8.4$  | $12.0 \pm 6.5$  | $13.9 \pm 5.8$    | $29.4 \pm 8.4$   |
| large-diverse    | $7.0 \pm 3.6$  | $3.3 \pm 3.6$   | $0.9 \pm 1.5$   | $9.0 \pm 5.9$     | $9.7 \pm 4.5$    |
| antmaze-v2 total | 186.0          | 222.3           | <b>228.6</b>    | 225.3             | <b>274.6</b>     |

\* Only two successful trajectories are in the chosen sub-dataset and the results belong to  $K=2$ .

**Varying the number of expert trajectories.** Using 10% of D4RL data, we vary the number of expert trajectories for sparse-reward offline RL settings in Table 1. We compare our method with baseline methods (IQL and OTR) when only one expert trajectory is selected. For comparison, we train IQL over the naive sparse-reward D4RL data and train OTR over the relabeled D4RL dataset (using optimal transport to compute intrinsic rewards and employing IQL to learn offline RL policy).

We can find that in 7 out of 12 AntMaze tasks across, our CLUE outperforms the baseline OTR. Meanwhile, compared to naive IQL (with sparse rewards), our CLUE implementation generally outperforms better than IQL. This means that with only a single expert trajectory, we can completely replace the *sparse rewards* with our intrinsic reward in offline RL tasks, which can even achieve higher performance in such a data-scarce scenario (10% of D4RL data).

Table 2: Normalized scores (mean) when varying the temperature factor  $c$  with a single expert trajectory ( $K=1$ ).

|                | $c = 1$ | $c = 2$ | $c = 3$ | $c = 4$ | $c = 5$ | $c = 6$ | $c = 7$ | $c = 8$ | $c = 9$ | $c = 10$ |
|----------------|---------|---------|---------|---------|---------|---------|---------|---------|---------|----------|
| umaze          | 89.4    | 89.96   | 91.84   | 90.88   | 91.96   | 92.12   | 91.68   | 90.72   | 90.92   | 91.2     |
| umaze-diverse  | 43.08   | 46.76   | 43.16   | 43.76   | 42.36   | 56.72   | 52.6    | 59.04   | 66.48   | 68       |
| medium-play    | 60.4    | 63.2    | 65.2    | 68.92   | 68.04   | 75.32   | 71.76   | 74.12   | 72.2    | 73.64    |
| medium-diverse | 57.8    | 63.28   | 63.24   | 62.04   | 66.04   | 70.12   | 73      | 74.56   | 69.4    | 72.92    |
| large-play     | 34.16   | 44.84   | 46.88   | 50.68   | 52.72   | 53.08   | 53.64   | 55.2    | 53.52   | 55.8     |
| large-diverse  | 27.04   | 33.96   | 43.16   | 46.8    | 44.88   | 47.44   | 47.44   | 49.92   | 47.28   | 47.11    |

Table 3: Normalized scores (mean) when varying the temperature factor  $c$  with 10 expert trajectories ( $K=10$ ).

|                | $c = 1$ | $c = 2$ | $c = 3$ | $c = 4$ | $c = 5$ | $c = 6$ | $c = 7$ | $c = 8$ | $c = 9$ | $c = 10$ |
|----------------|---------|---------|---------|---------|---------|---------|---------|---------|---------|----------|
| umaze          | 87.88   | 90      | 91.08   | 90.96   | 91.16   | 91      | 89.92   | 89.44   | 90.72   | 91.92    |
| umaze-diverse  | 45.64   | 40.32   | 41.04   | 38.8    | 39.52   | 51.64   | 51.2    | 57.11   | 69.92   | 71.68    |
| medium-play    | 58.72   | 64.2    | 68.24   | 71.44   | 69.92   | 75.56   | 74.12   | 76.2    | 75.8    | 76.48    |
| medium-diverse | 60.36   | 57.04   | 62.12   | 64.24   | 63.56   | 61.44   | 62.36   | 64.64   | 65.47   | 69.2     |
| large-play     | 48.24   | 45.8    | 51.56   | 48.2    | 48.4    | 52.36   | 49.91   | 50.58   | 52.28   | 51.87    |
| large-diverse  | 36.32   | 46.08   | 48.64   | 50.84   | 51.16   | 52.44   | 53.6    | 50.92   | 51.4    | 53.68    |

**Varying the value of the temperature factor in intrinsic rewards.** In Tables 2 and 3, we present the results on AntMaze tasks when we vary the value of the temperature factor  $c$  in intrinsic rewards. We can find that CLUE can generally achieve a robust performance across a range of temperature factors. In Figure 2, we further analyze our intrinsic reward distribution following OTR. We can find that CLUE’s reward prediction shows a stronger correlation with the ground-truth rewards from the dataset, which can be served as a good reward proxy for downstream offline RL algorithms.

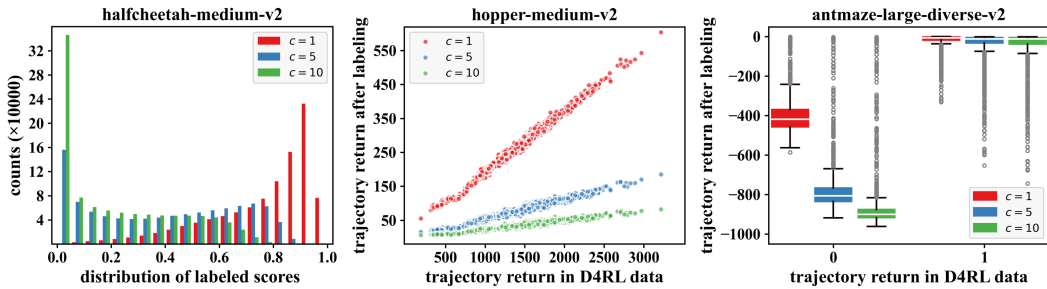

Figure 2: Qualitative comparison of the learned intrinsic rewards with different temperature factors.

## B Experimental Details

### B.1 Hyperparameters for CVAE Implementation

We list the hyperparameters used for training CVAE models in MuJoCO locomotion, AntMaze, and Adroit tasks. The other CVAE hyperparameters are kept the same as those used in Wu et al. [1].

Table 4: Hyperparameters for training CVAE.

|                                          | MuJoCo Locomotion |              | Antmaze   |              | Adroit    |
|------------------------------------------|-------------------|--------------|-----------|--------------|-----------|
|                                          | full-data         | partial-data | full-data | partial-data | full-data |
| Hidden dim                               | 128               | 128          | 512       | 512          | 128       |
| Batch size                               | 128               | 128          | 256       | 256          | 128       |
| Numbers of iterations                    | $10^4$            | $10^4$       | $10^5$    | $10^5$       | $10^5$    |
| Learning rate                            | $10^{-4}$         | $10^{-4}$    | $10^{-3}$ | $10^{-3}$    | $10^{-4}$ |
| Weight for $\mathcal{L}_{\text{calibr}}$ | 0.1               | 0.1          | 0.8       | 0.8          | 0.1       |
| Spare-reward setting:                    |                   |              |           |              |           |
| Number of expert trajectories            | 3                 | 3            | 5         | 5            | 3         |

## 29 B.2 Hyperparameters for our IQL Implementation

30 The IQL hyperparameters employed in this paper are consistent with those utilized by Kostrikov  
 31 et al. [2] in their offline implementation. It is important to note that IQL incorporates a procedure  
 32 for rescaling rewards within the dataset, which allows for the use of the same hyperparameters  
 33 across datasets that differ in quality. As CLUE generates rewards offline, we similarly apply reward  
 34 scaling following the IQL methodology. For the locomotion, adroit, and ant tasks, we rescale rewards  
 35 with  $\frac{1000}{\max\_return - \min\_return}$ . To regularize the policy network for the chosen sub-dataset, we similarly  
 36 introduce Dropout with a rate of 0.2.

37 **MuJoCo locomotion and Adroit tasks.** We set the learning rate  $10^{-3}$  for *hopper-medium-expert*  
 38 dataset (K=10) and  $3 \times 10^{-4}$  for the rest of tasks. We run IQL for 1M gradient steps and average  
 39 mean returns over 10 random seeds and 10 evaluation trajectories for each seed.

40 **Antmaze tasks.** We set the learning rate  $5 \times 10^{-4}$  for *umaze-diverse* dataset (K=1 and K=10) and  
 41  $3 \times 10^{-4}$  for the rest of tasks. For *medium-play* dataset (K=1 and K=10), *medium-diverse* dataset  
 42 (K=1), and *large-play* dataset (K=10), we set the dropout rate 0.2 to gain a better performance. We  
 43 run IQL for 1M gradient steps for the full dataset and 0.3M for the partial dataset, respectively.

## 44 B.3 Hyperparameters in K-means

45 We use CLUE to learn diversity skills on *Ant-v2*, *HalfCheetah-v2*, and *Walker2d-v2*. The K-means,  
 46 an unsupervised learning method, is employed to cluster the offline transitions  $\{(s, a, s')\}$  from each  
 47 dataset into 100 classes and take each class as a separate "expert". Specifically, we use *KMEANS*  
 48 method exacted from *sklearn.cluster* API. The hyperparameters are set as follows: `n_clusters =`  
 49 `100`, `random_state = 1`, `n_init = 1`, `max_iter = 300`.

## 50 B.4 Offline IL Baselines

51 **SQIL** proposes to learn a soft Q-function where the reward labels for the expert transitions are one  
 52 and the reward labels for the non-expert transitions are zero. The offline implementation of SQIL is  
 53 adapted from the online SAC agent provided by Garg et al. [3], and we combine it with TD3+BC.

54 **IQ-Learn** advocates for directly learning a Q-function by contrasting the expert data with the  
 55 data collected in the replay buffer, thus avoiding the intermediate step of reward learning. In our  
 56 experiments, we used the official PyTorch implementation<sup>1</sup> with the recommended configuration by  
 57 Garg et al. [3].

58 **ORIL** assumes the offline dataset is a mixture of both optimal and suboptimal data and learns a  
 59 discriminator to distinguish between them. Then, the output of the discriminator is used as the  
 60 reward label to optimize the offline policy toward expert behaviors. We borrowed the TD3+BC  
 61 implementation reproduced by Ma et al. [4] in our experiments.

<sup>1</sup><https://github.com/Div99/IQ-Learn>

62 **ValueDICE** is the earliest DICE-based IL algorithm that minimizes the divergence of the state-action  
63 distribution between the learning policy and the expert data. The code used in the experiments is the  
64 official TensorFlow implementation<sup>2</sup> released by Kostrikov et al. [5].

65 **DemoDICE** proposes to optimize the policy via a state-action distribution matching objective with  
66 an extra offline regularization term. We report the performance of DemoDICE using the TensorFlow  
67 implementation<sup>3</sup> by Kim et al. [6], while the hyperparameters are set as same as the ones in the paper.

68 **SMODICE** aims to solve the problem of learning from observation and thus proposes to minimize  
69 the divergence of state distribution. Besides, Ma et al. [4] extends the choice of divergence so that the  
70 agent is more generalized. The code and configuration used in our experiments are from the official  
71 repository<sup>4</sup>.

## 72 C Learned Diverse Skills

73 To encourage diverse skills from reward-free offline data, we cluster the offline transitions into 100  
74 classes using K-means and take each class as a separate "expert". Then, we use these expert data from  
75 different classes to label the original reward-free data and train IQL policy to learn the corresponding  
76 skills. In this section, we illustrate all the learned skills by CLUE.

---

<sup>2</sup>[https://github.com/google-research/google-research/tree/master/value\\_dice](https://github.com/google-research/google-research/tree/master/value_dice)

<sup>3</sup><https://github.com/KAIST-AILab/imitation-dice>

<sup>4</sup><https://github.com/JasonMa2016/SMODICE>

77 C.1 Learned Diverse Skills from Ant-Medium Dataset

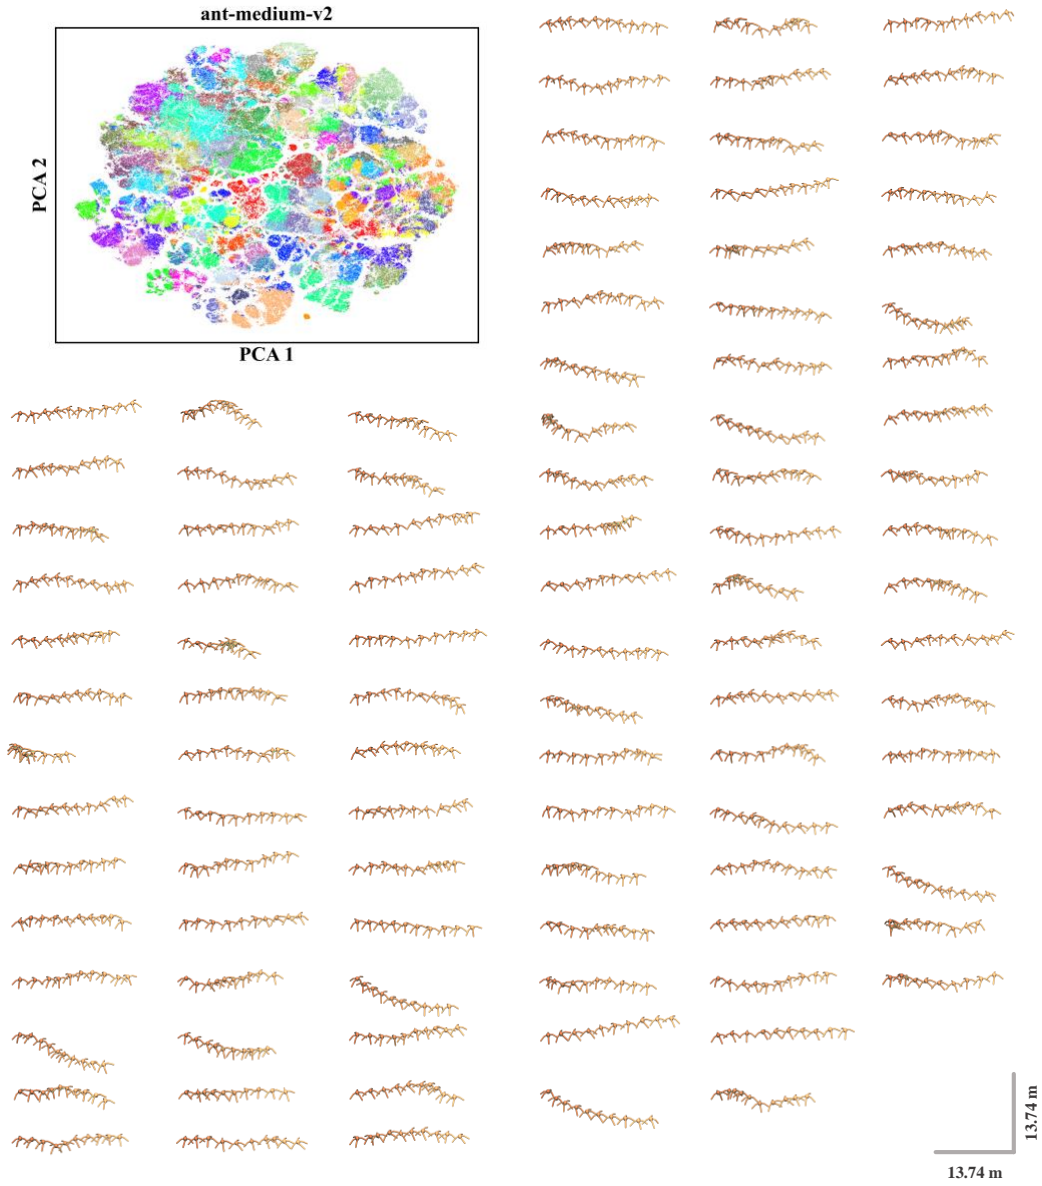

Figure 3: Visualization of unsupervised skills learned from the ant-medium dataset.

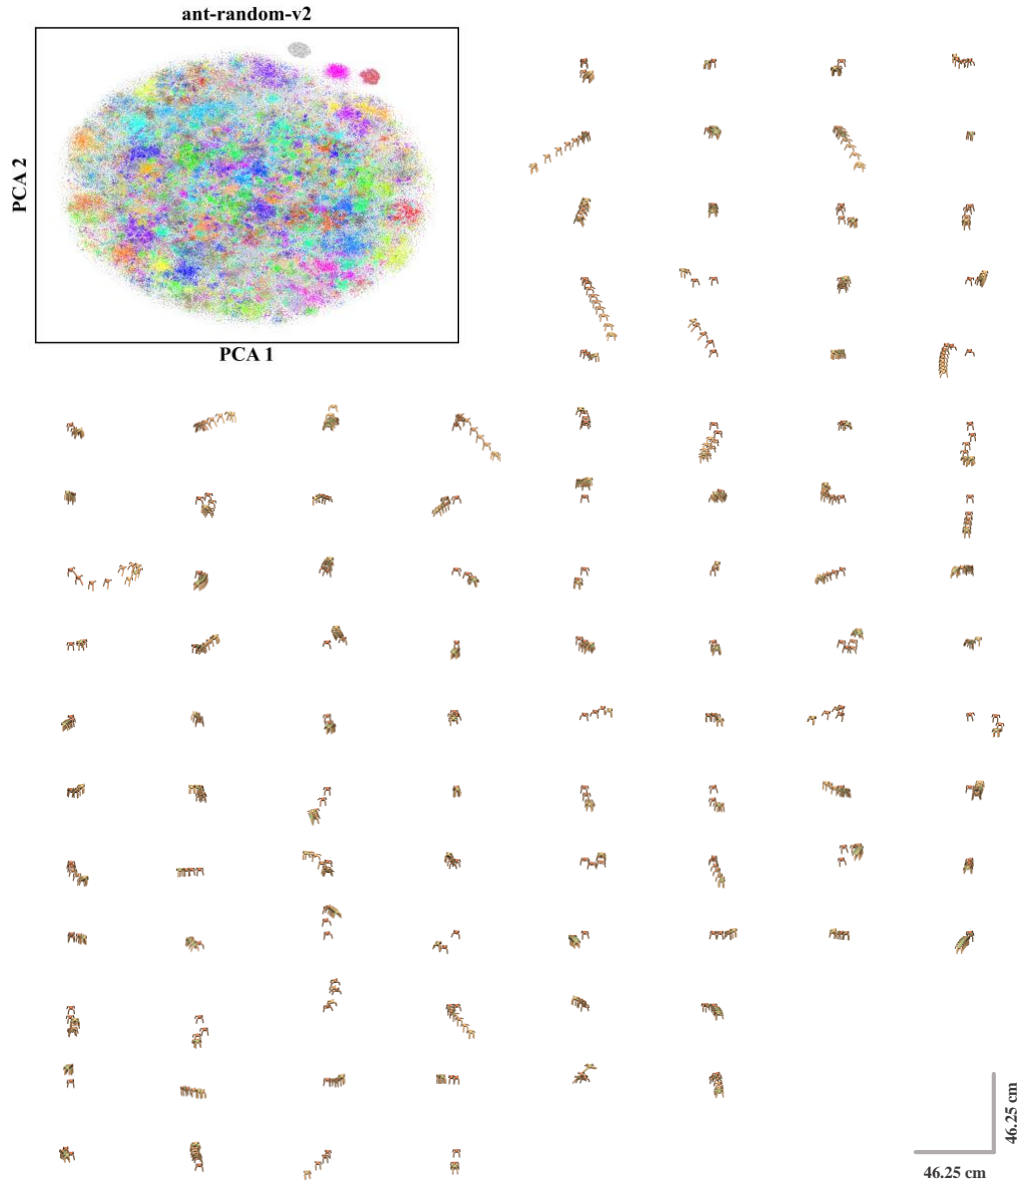

Figure 4: Visualization of unsupervised skills learned from the ant-random dataset.

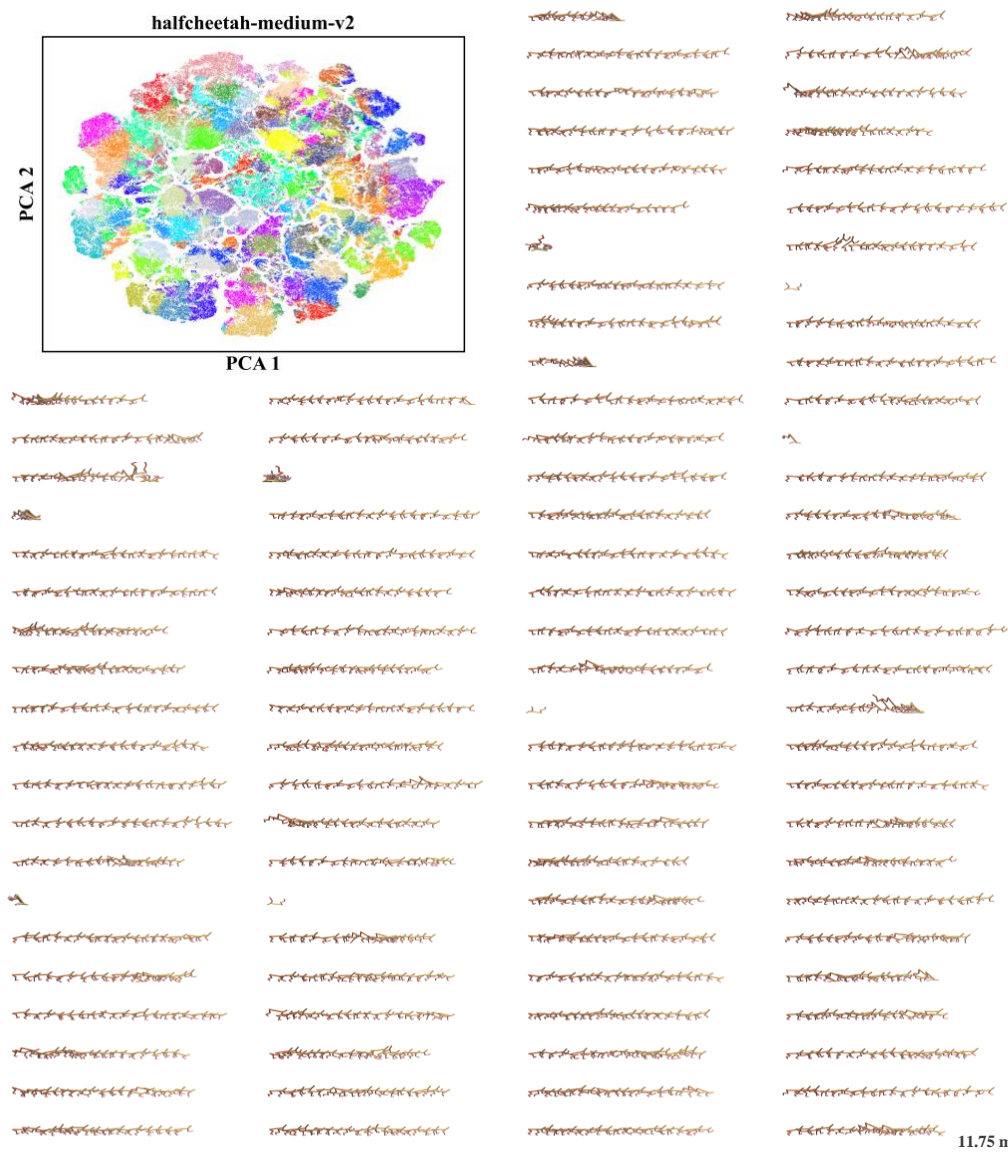

Figure 5: Visualization of unsupervised skills learned from the halfcheetah-medium dataset.

80 C.4 Learned Diverse Skills from Halfcheetah-Random Dataset

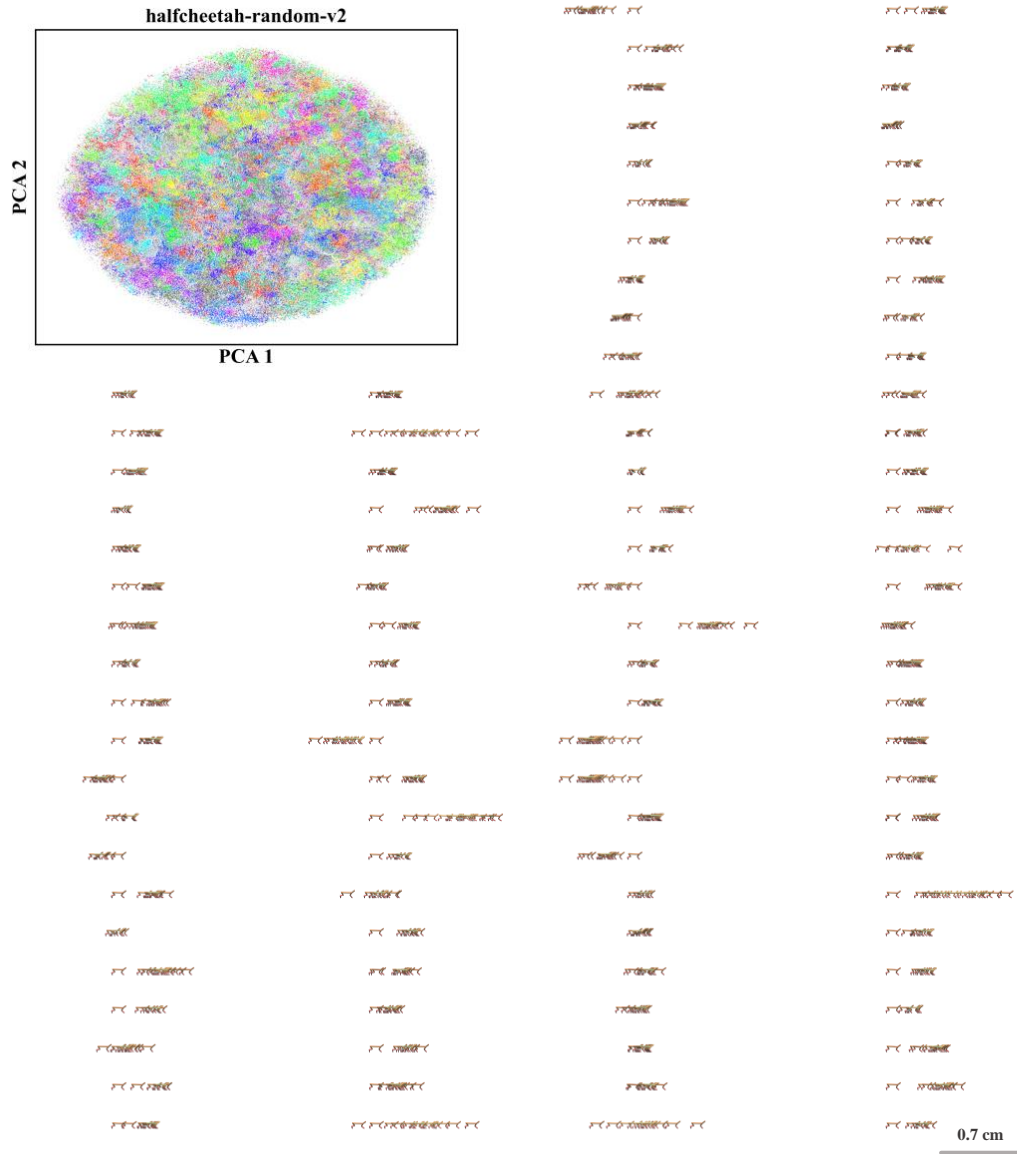

Figure 6: Visualization of unsupervised skills learned from the halfcheetah-random dataset.



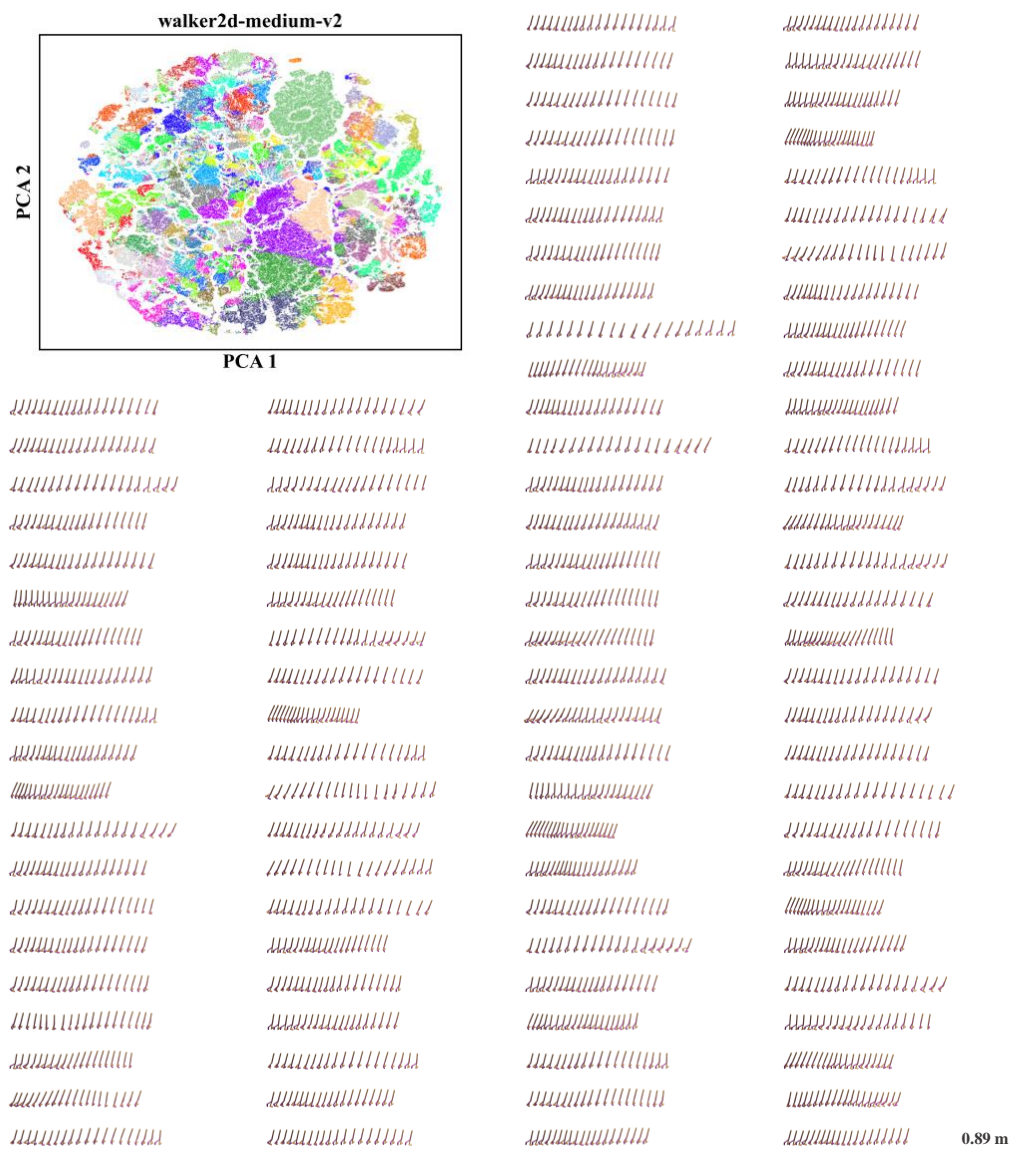

Figure 7: Visualization of unsupervised skills learned from the walker2d-medium dataset.

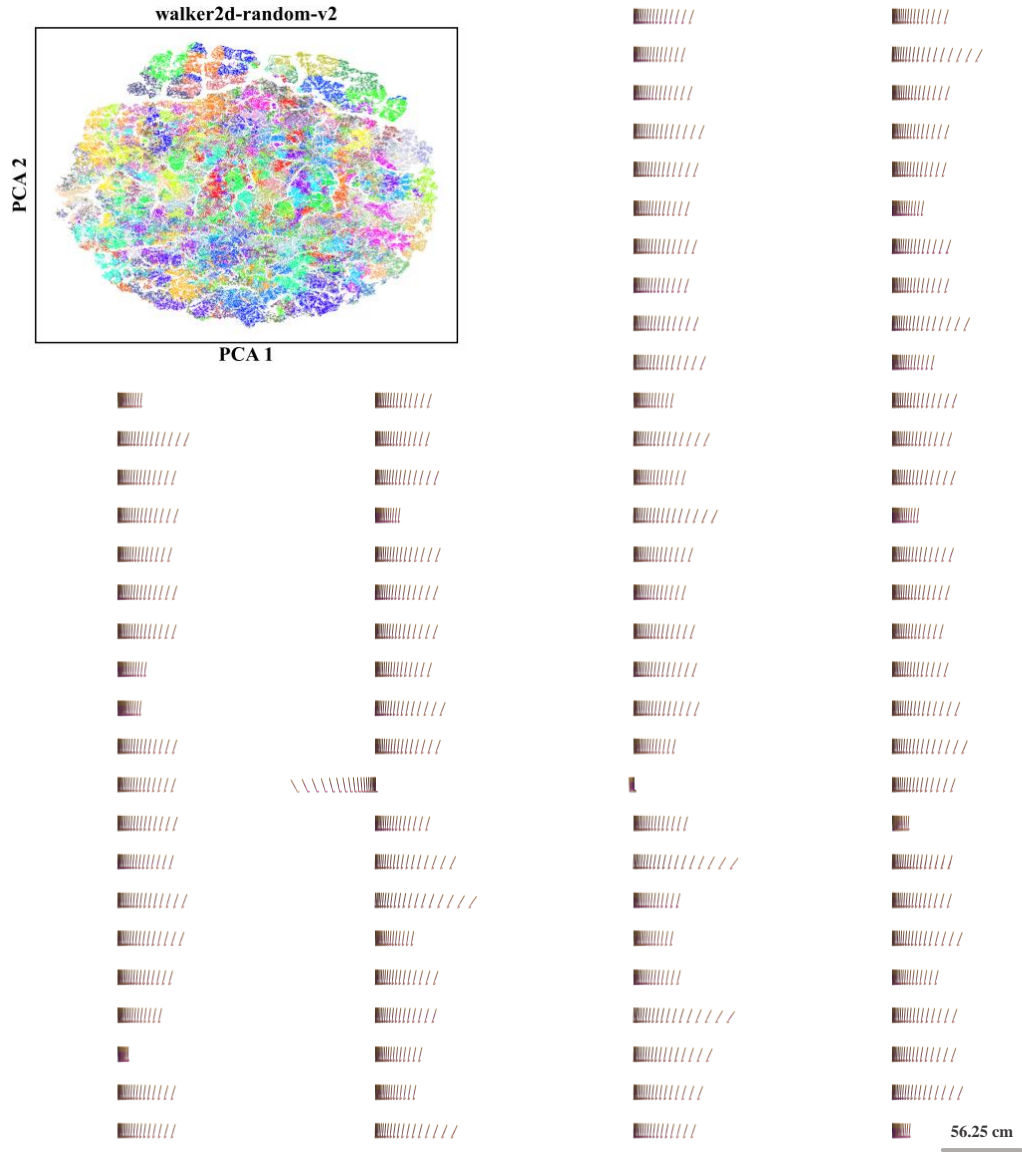

Figure 8: Visualization of unsupervised skills learned from the walker2d-random dataset.

## 83 **References**

- 84 [1] J. Wu, H. Wu, Z. Qiu, J. Wang, and M. Long. Supported policy optimization for offline  
85 reinforcement learning, 2022.
- 86 [2] I. Kostrikov, A. Nair, and S. Levine. Offline reinforcement learning with implicit q-learning,  
87 2021.
- 88 [3] D. Garg, S. Chakraborty, C. Cundy, J. Song, and S. Ermon. Iq-learn: Inverse soft-q learning for  
89 imitation. *Advances in Neural Information Processing Systems*, 34:4028–4039, 2021.
- 90 [4] Y. J. Ma, A. Shen, D. Jayaraman, and O. Bastani. Smodice: Versatile offline imitation learning  
91 via state occupancy matching. *arXiv e-prints*, pages arXiv–2202, 2022.
- 92 [5] I. Kostrikov, O. Nachum, and J. Thompson. Imitation learning via off-policy distribution matching.  
93 *arXiv preprint arXiv:1912.05032*, 2019.
- 94 [6] G.-H. Kim, S. Seo, J. Lee, W. Jeon, H. Hwang, H. Yang, and K.-E. Kim. Demodice: Offline  
95 imitation learning with supplementary imperfect demonstrations. In *International Conference on*  
96 *Learning Representations*, 2022.
